# Supplementary material for: Artificial intelligence-based morphometric signature to identify ductal carcinoma in situ with low risk of progression to invasive breast cancer
Source: Research Square preprint supplement (doi:10.21203/rs.3.rs-3639521/v1), 2023-12-13
Supplement: Supplementary file 1 [file 853d42a6208ddca706fe8316.xlsx]

## Sheet: Sheet1
Table 2
Measurements		Parameter	abbreviation	OR	95%CI
DCIS geometrics
	area of DCIS ducts	Kernel density	area-[kd]	0.81	(0.72-0.9)
		standard deviation	area-[sd]	0.8	(0.72-0.9)
		total	area-[to]	0.82	(0.73-0.92)
	estimated radius of DCIS ducts	Kernel density	radius-[kd]	0.82	(0.73-0.92)
		mean	radius-[me]	0.82	(0.73-0.92)
		range	radius-[rg]	0.81	(0.72-0.91)
		total	radius-[to]	0.86	(0.77-0.96)
	perimeter of DCIS ducts	Kernel density	perimeter-[kd]	0.84	(0.75-0.94)
		mean	perimeter-[me]	0.83	(0.74-0.93)
		median	perimeter-[md]	0.86	(0.77-0.97)
		range	perimeter-[rg]	0.82	(0.73-0.92)
		skewness	perimeter-[sk]	0.88	(0.79-0.99)
	roundness of DCIS ducts	mode	roundness-[mo]	1.13	(1.01-1.26)
		range	roundness-[rg]	0.85	(0.76-0.95)
		skewness	roundness-[sk]	0.82	(0.74-0.92)
	circular shape of DCIS ducts	range	shape-[rg]	0.82	(0.73-0.92)
		standard deviation	shape-[sd]	0.82	(0.73-0.91)
		skewness	shape-[sk]	1.13	(1-1.26)
DCIS cells geometrics
	number of cells per DCIS duct area	Kernel density	cellularity-[kd]	1.14	(1.01-1.27)
	number of cells per DCIS duct	Kernel density	cells/duct-[kd]	0.8	(0.71-0.89)
		median	cells/duct-[md]	0.81	(0.72-0.91)
		standard deviation	cells/duct-[sd]	0.81	(0.72-0.9)
		total	cells/duct-[to]	0.83	(0.74-0.93)
	variation of cell nucleus size in a DCIS duct	skewness	nuc size var-[sk]	1.13	(1.01-1.27)
		total	nuc size var-[to]	0.88	(0.78-0.99)
DCIS spatial arrangement
	maximal distances between DCIS ducts	standard deviation	max duct dist-[sd]	0.85	(0.76-0.95)
		total	min duct dist-[to]	0.87	(0.78-0.98)
single-cell spatial arrangement
	maximal cell distances within DCIS ducts	standard deviation	max cell dist-[sd]	0.89	(0.79-0.99)
		Kernel density	min cell dist-[kd]	1.13	(1.01-1.27)
microenvironment
	DCIS/stroma	ratio	DCIS/stroma-(r)	0.81	(0.73-0.91)
