# Supplementary material for: Artificial intelligence-based morphometric signature to identify ductal carcinoma in situ with low risk of progression to invasive breast cancer
Source: Research Square preprint supplement (doi:10.21203/rs.3.rs-3639521/v1), 2023-12-13
Supplement: Supplementary file 2 [file 9bfe3553d3d1a36fc7506ce4.xlsx]

## Sheet: Sheet1
Table 1
		Controls (n=463)	Cases (n=226)
DCIS detection
	interval	23 (4%)	7 (3%)
	non-screen-detected	153 (33%)	89 (39%)
	screen-detected	239 (51%)	106 (46%)
	unknown	48 (10%)	24 (10%)
Age (years)		59.1 (30.1-88.5)	58.6 (30.2-88.6)
Dominant growth pattern
	Solid	250 (53%)	127 (56%)
	Cribriform	106 (22%)	46 (20%)
	(Micro)papillary	43 (9%)	28 (12%)
	Clinging/FEA	24 (5%)	13 (5%)
	unknown	40 (8%)	12 (5%)
Histologic grade
	1	82 (17%)	28 (12%)
	2	236 (50%)	119 (52%)
	3	105 (22%)	67 (29%)
	unknown	40 (8%)	12 (5%)
ER expression
	Negative	76 (16%)	34 (15%)
	Positive	299 (64%)	161 (71%)
	unknown	88 (19%)	31 (13%)
HER2 expression
	Negative	277 (59%)	132 (58%)
	Positive	96 (20%)	62 (27%)
	unknown	90 (19%)	32 (14%)
COX-2 expression
	Negative	79 (17%)	23 (10%)
	Positive	299 (64%)	175 (77%)
	unknown	85 (18%)	28 (12%)
